# Supplementary material for: Innate Attractiveness and Associative Learnability of Odors Can Be Dissociated in Larval Drosophila
Source: PubMed Central journal article supplement — Chem Senses. 2011 Jan 11;36(3):223–35. doi: 10.1093/chemse/bjq128 (PMC3038274; doi:10.1093/chemse/bjq128), 2011-01-11
Supplement: supp_bjq128_cs-10-102-File002.pdf [file supp_bjq128_cs-10-102-File002.pdf]

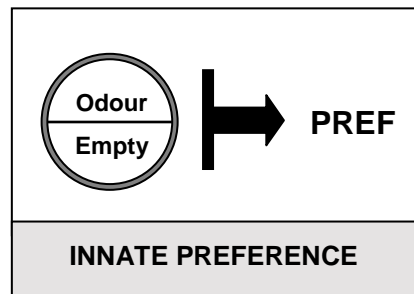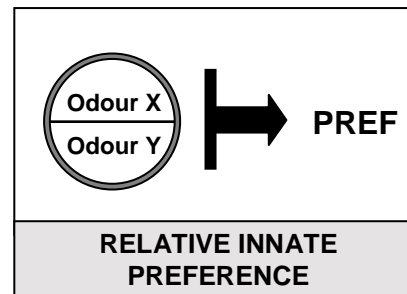

Figure 1A

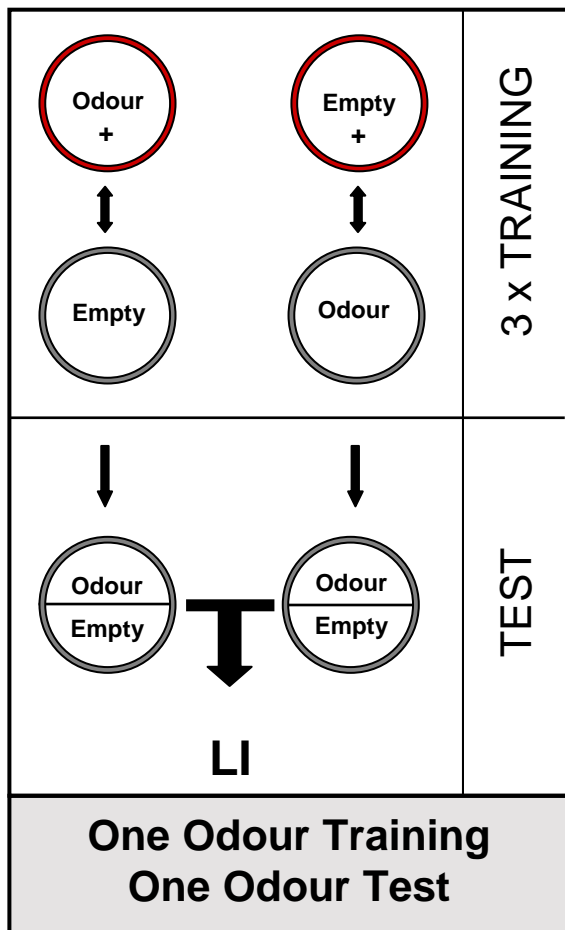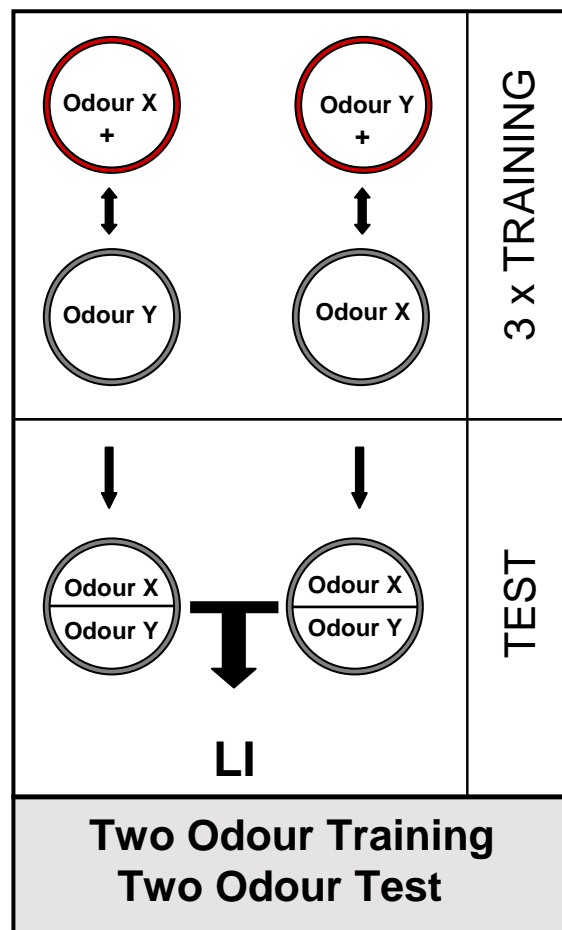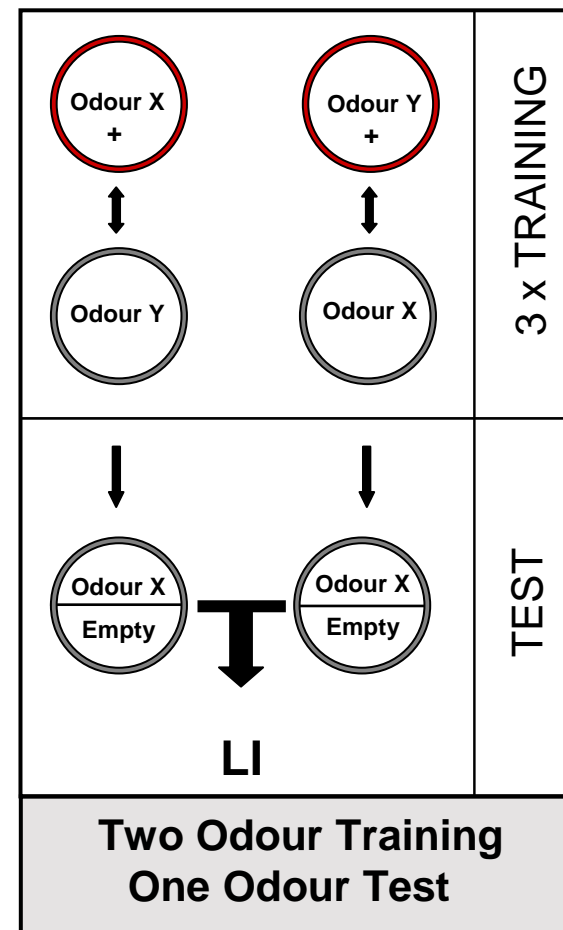

Figure 1B

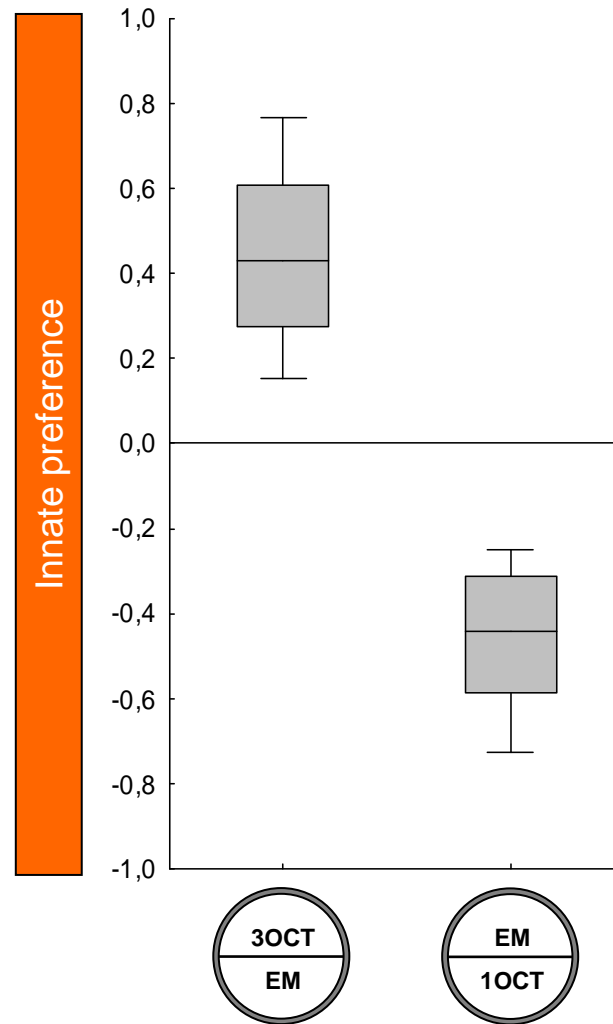

Figure 2A

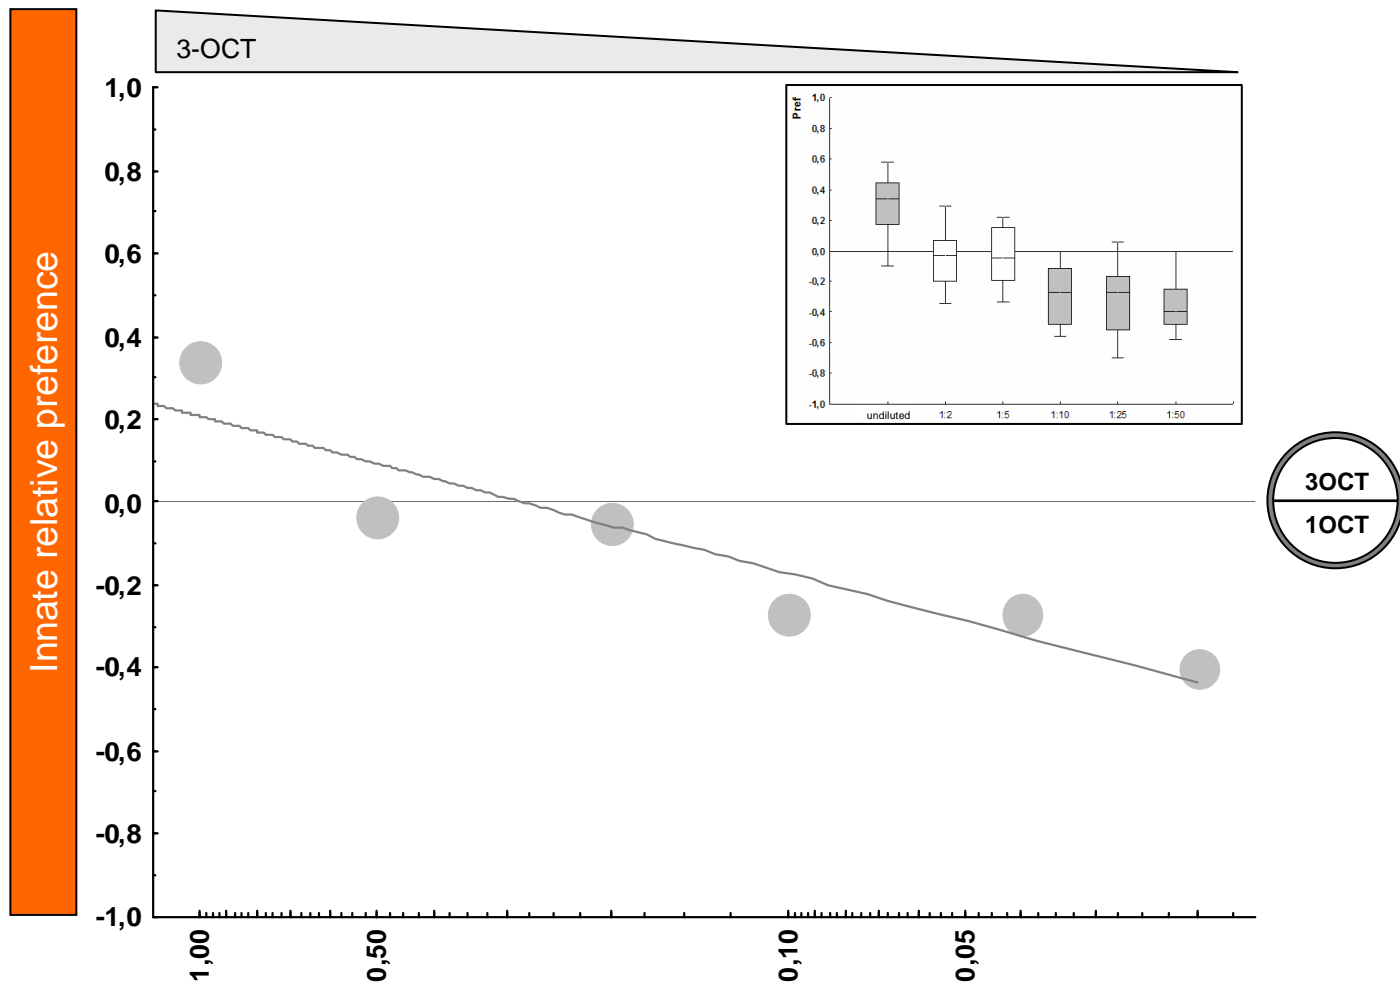

Figure 2B

Learning 3OCT & 1OCT

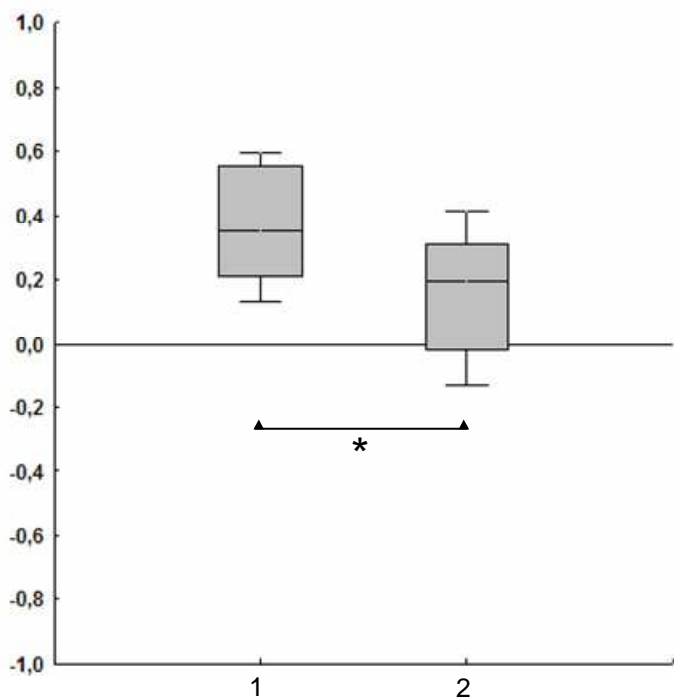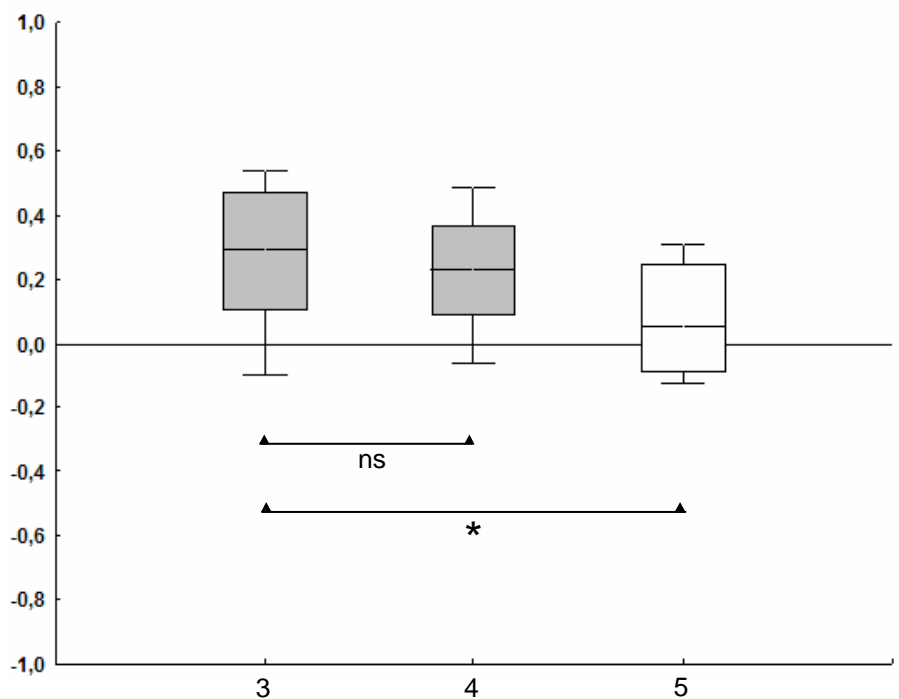

TRAIN

3OCT // EM

1OCT // EM

3OCT // 1OCT

3OCT // EM

EM // 1OCT

TEST

3OCT -- EM

1OCT -- EM

3OCT -- 1OCT

3OCT -- EM

EM -- 1OCT

Figure 2C

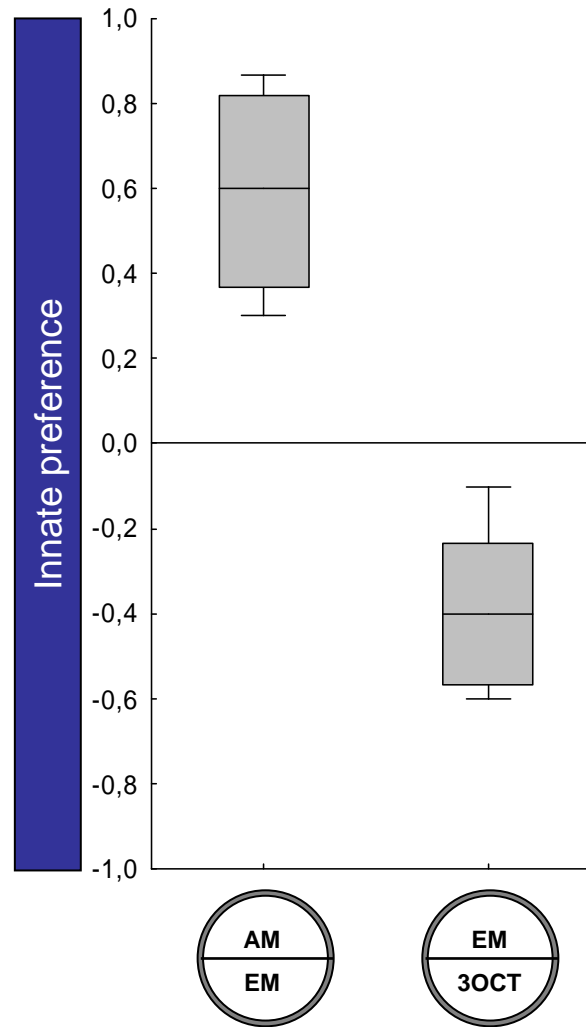

Figure 3A

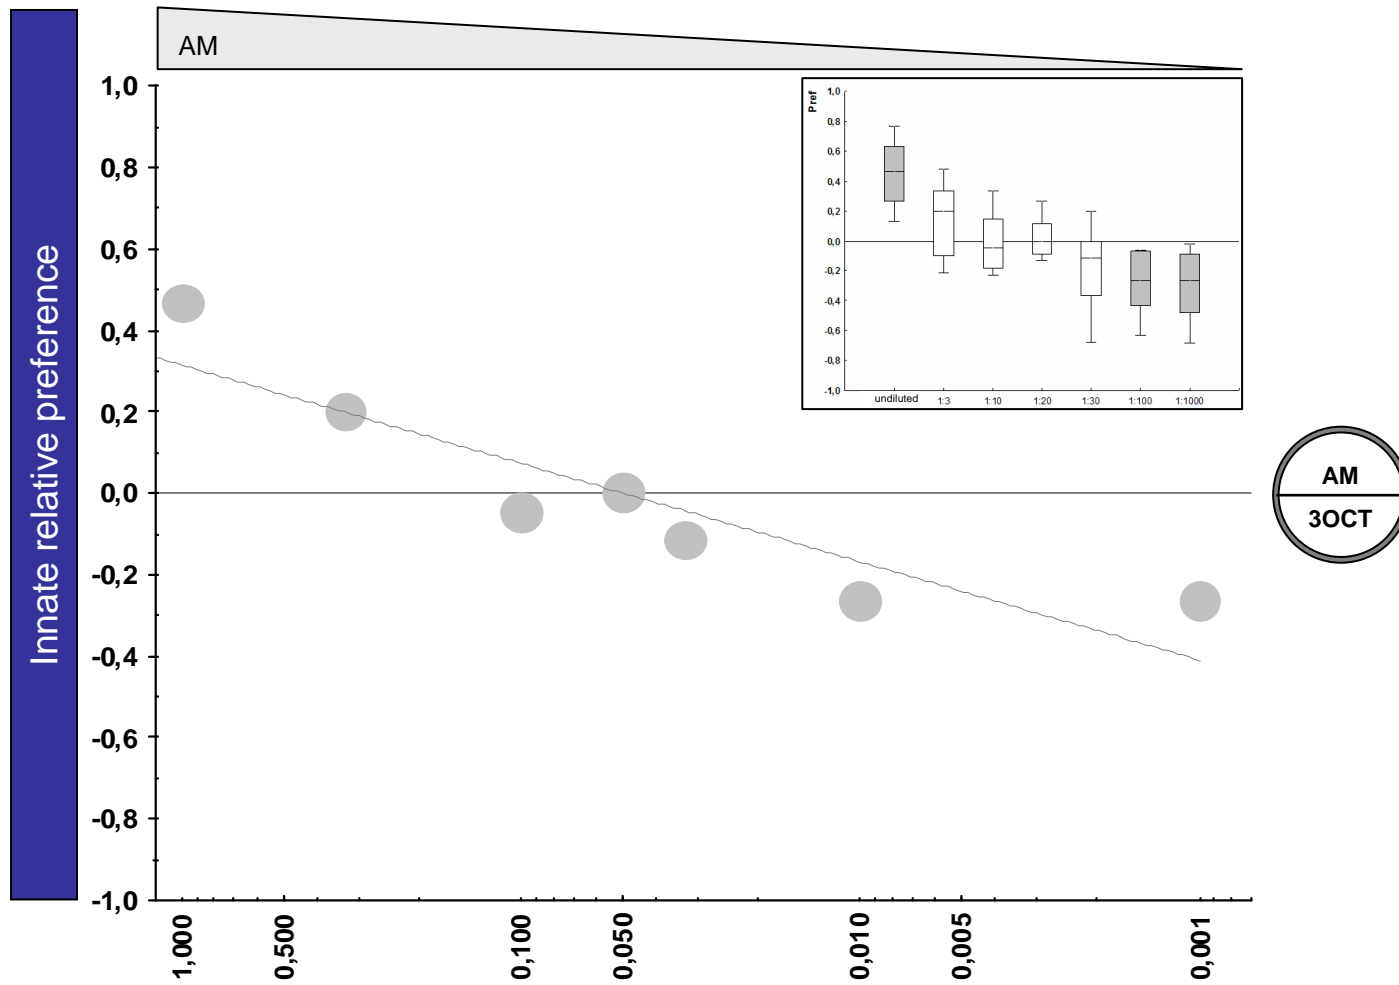

Figure 3B

Learning AM & 3OCT

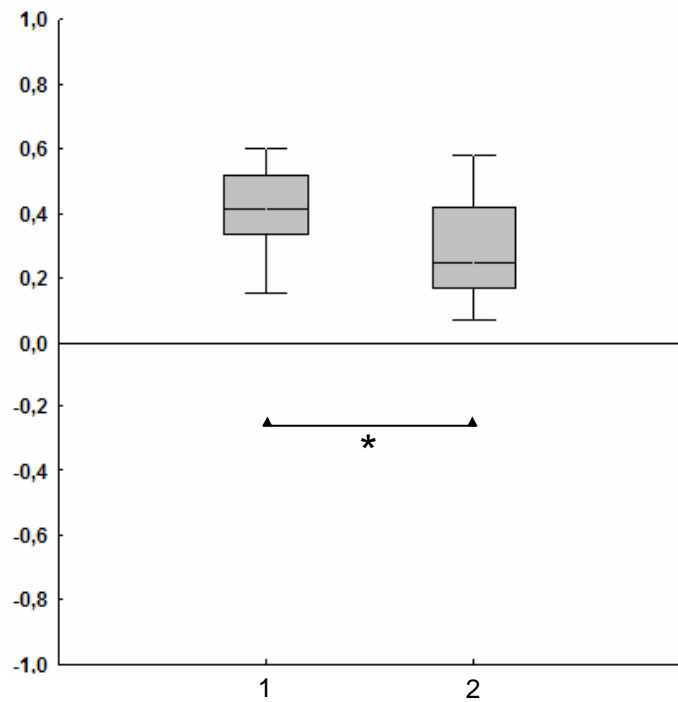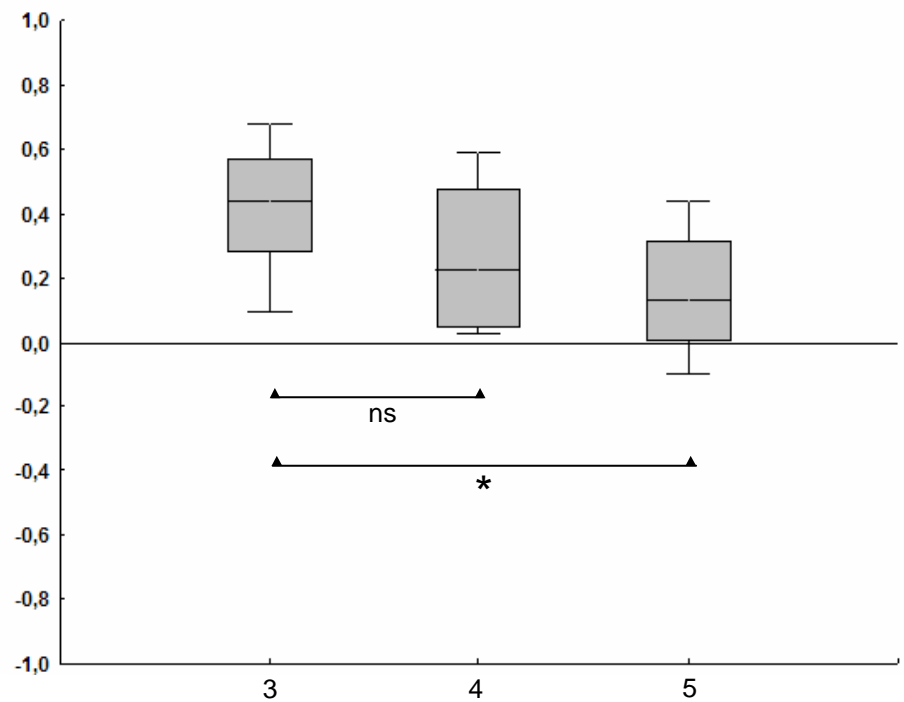

TRAIN

|          |            |
|----------|------------|
| AM // EM | 3OCT // EM |
|----------|------------|

|            |            |            |
|------------|------------|------------|
| AM // 3OCT | AM // 3OCT | AM // 3OCT |
|------------|------------|------------|

TEST

|          |            |
|----------|------------|
| AM -- EM | 3OCT -- EM |
|----------|------------|

|            |          |            |
|------------|----------|------------|
| AM -- 3OCT | AM -- EM | EM -- 3OCT |
|------------|----------|------------|

Figure 3C



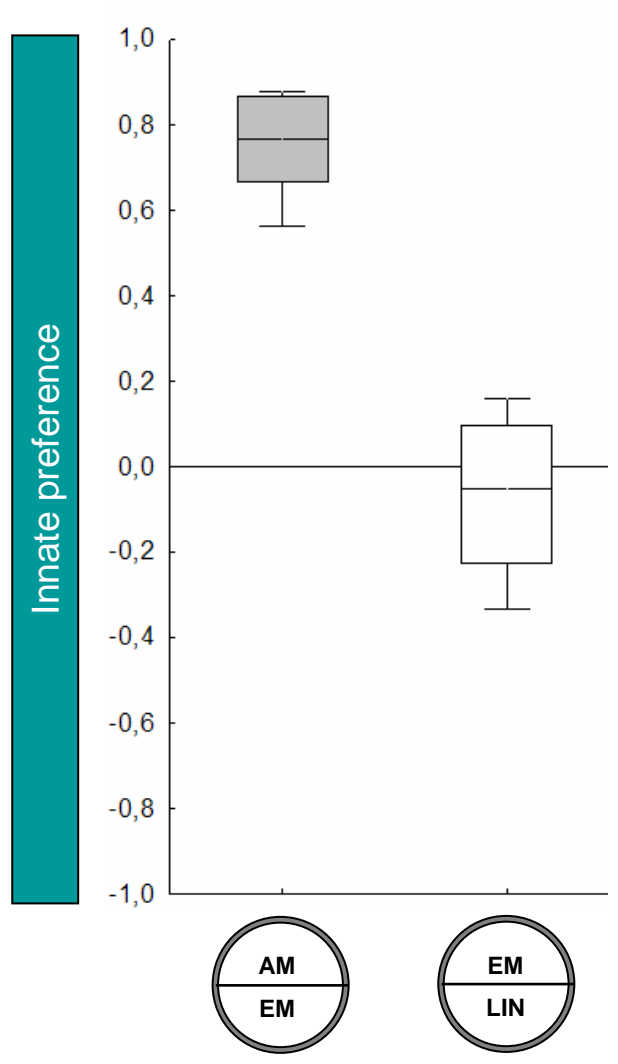

Figure 4A

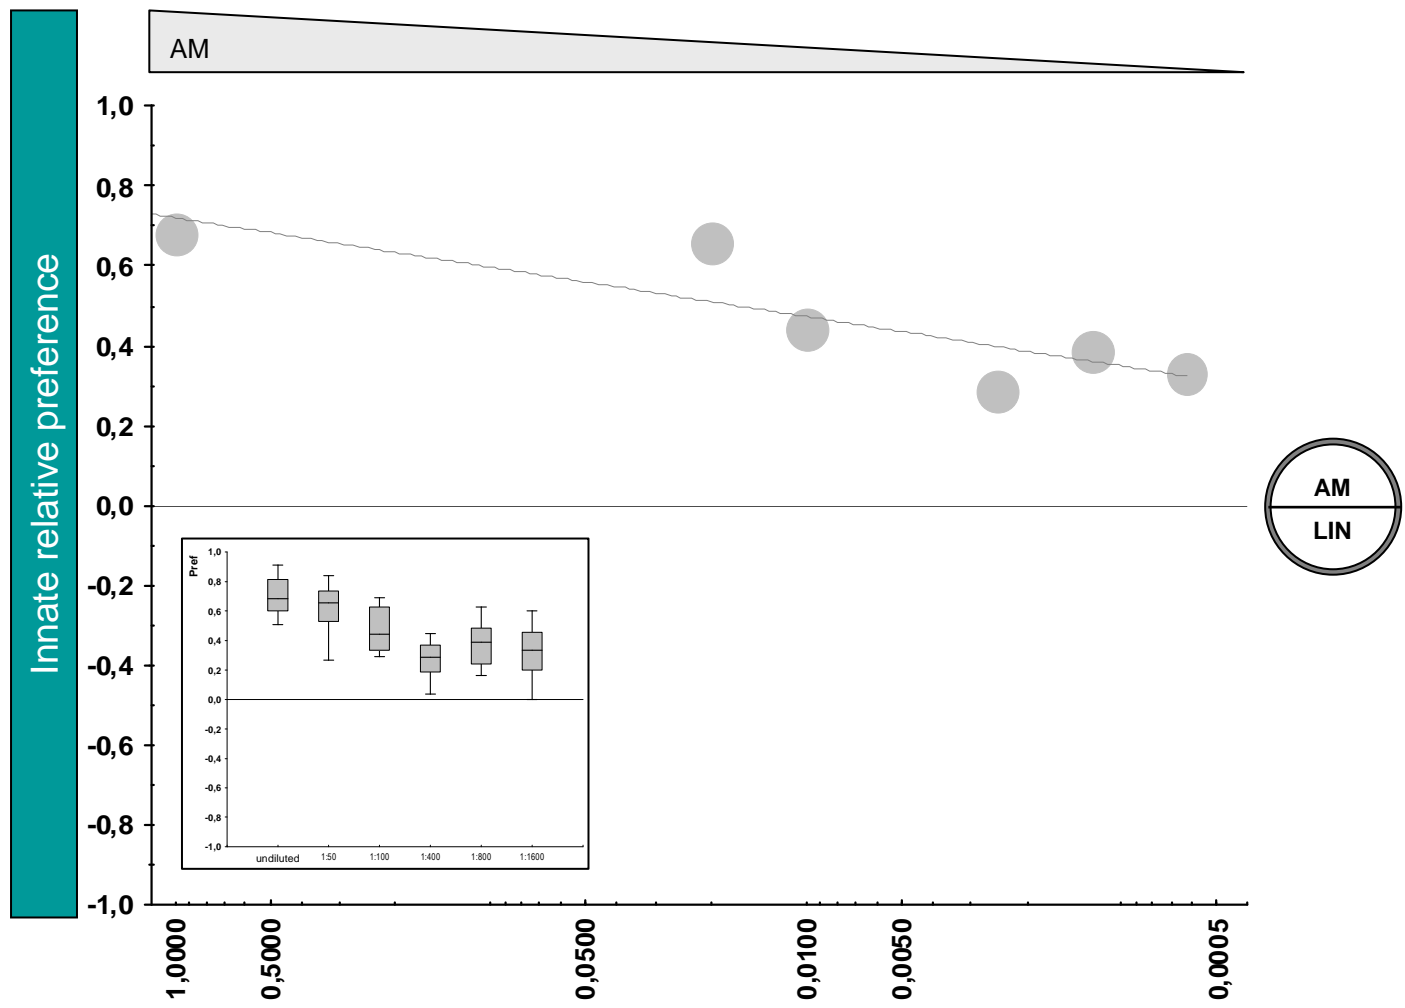

Figure 4B

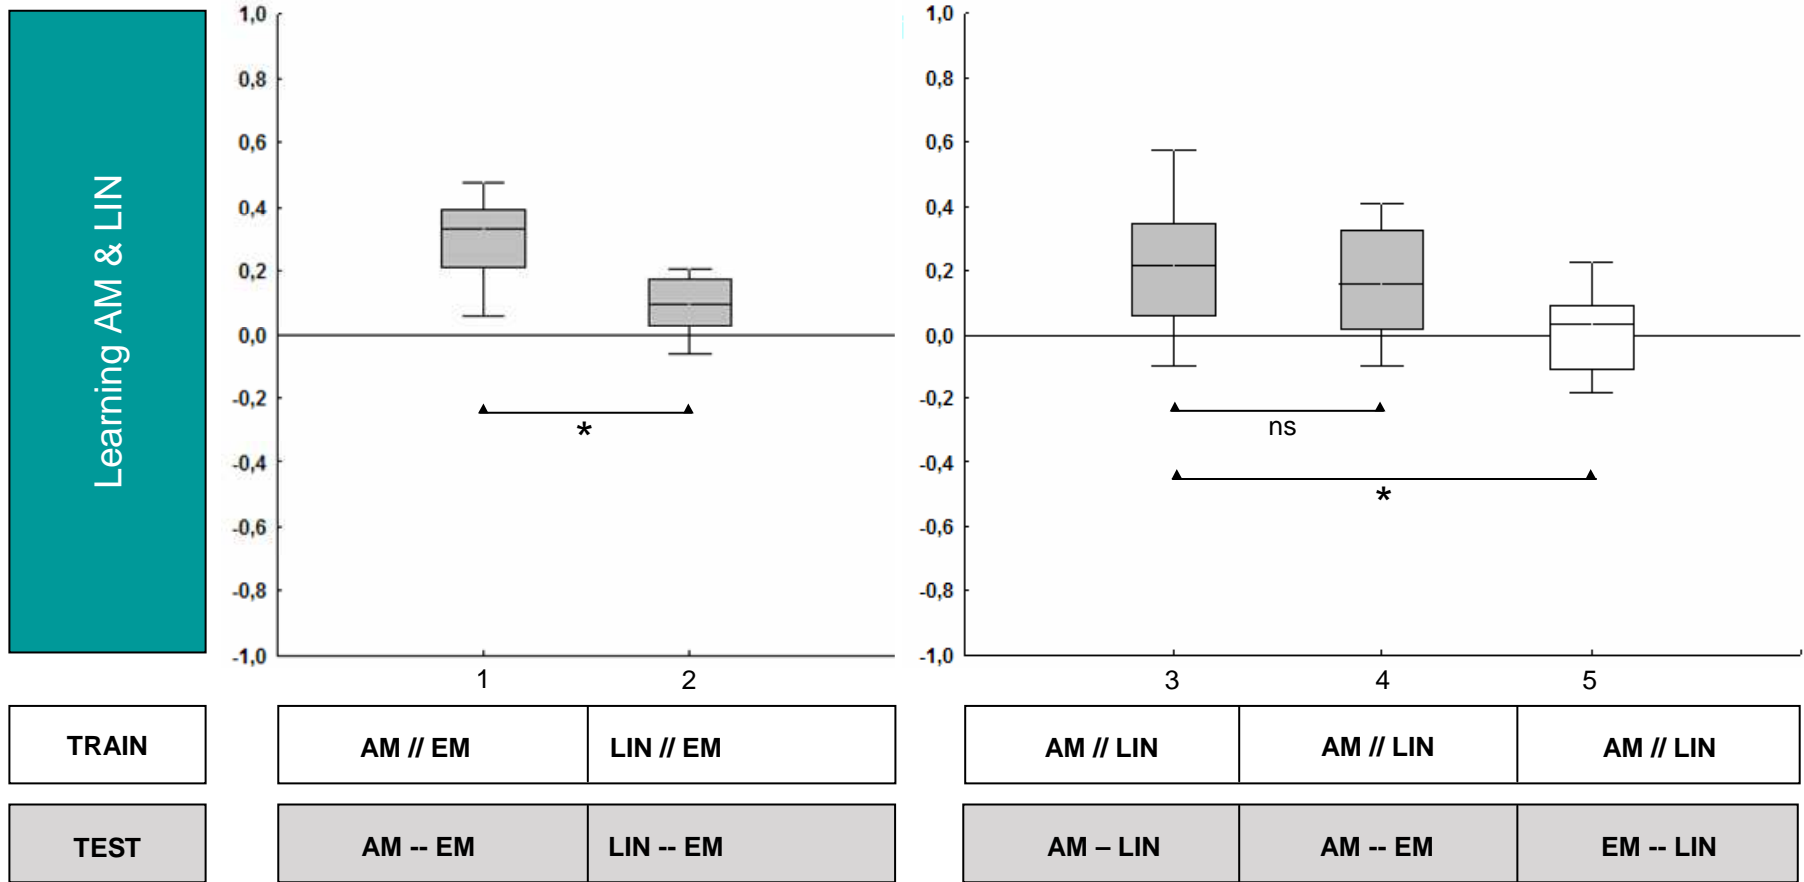

Figure 4C

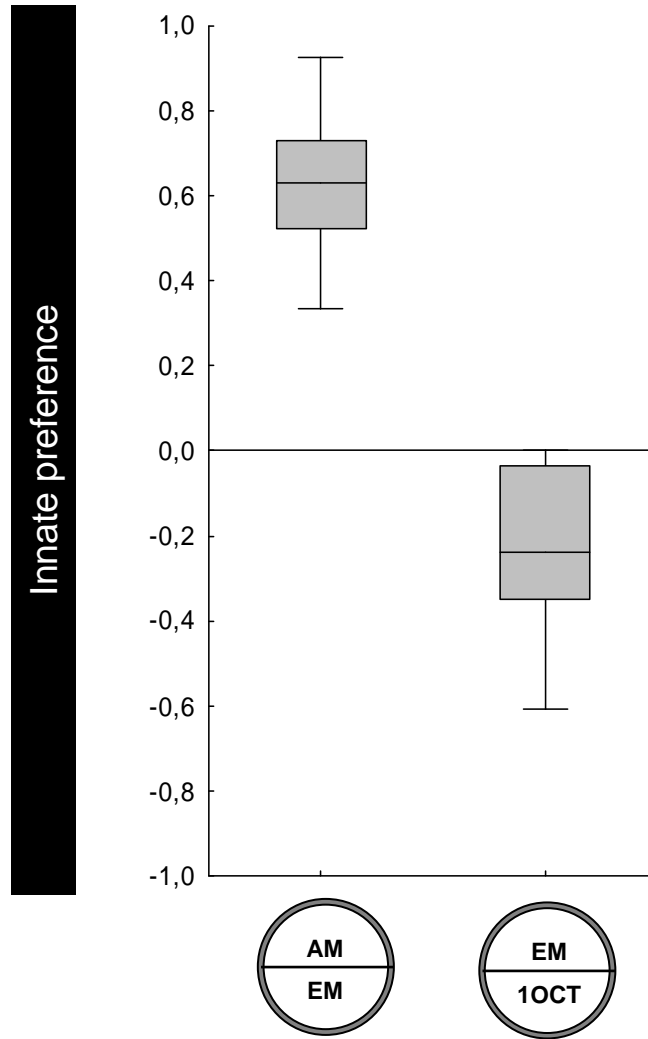

Figure 5A

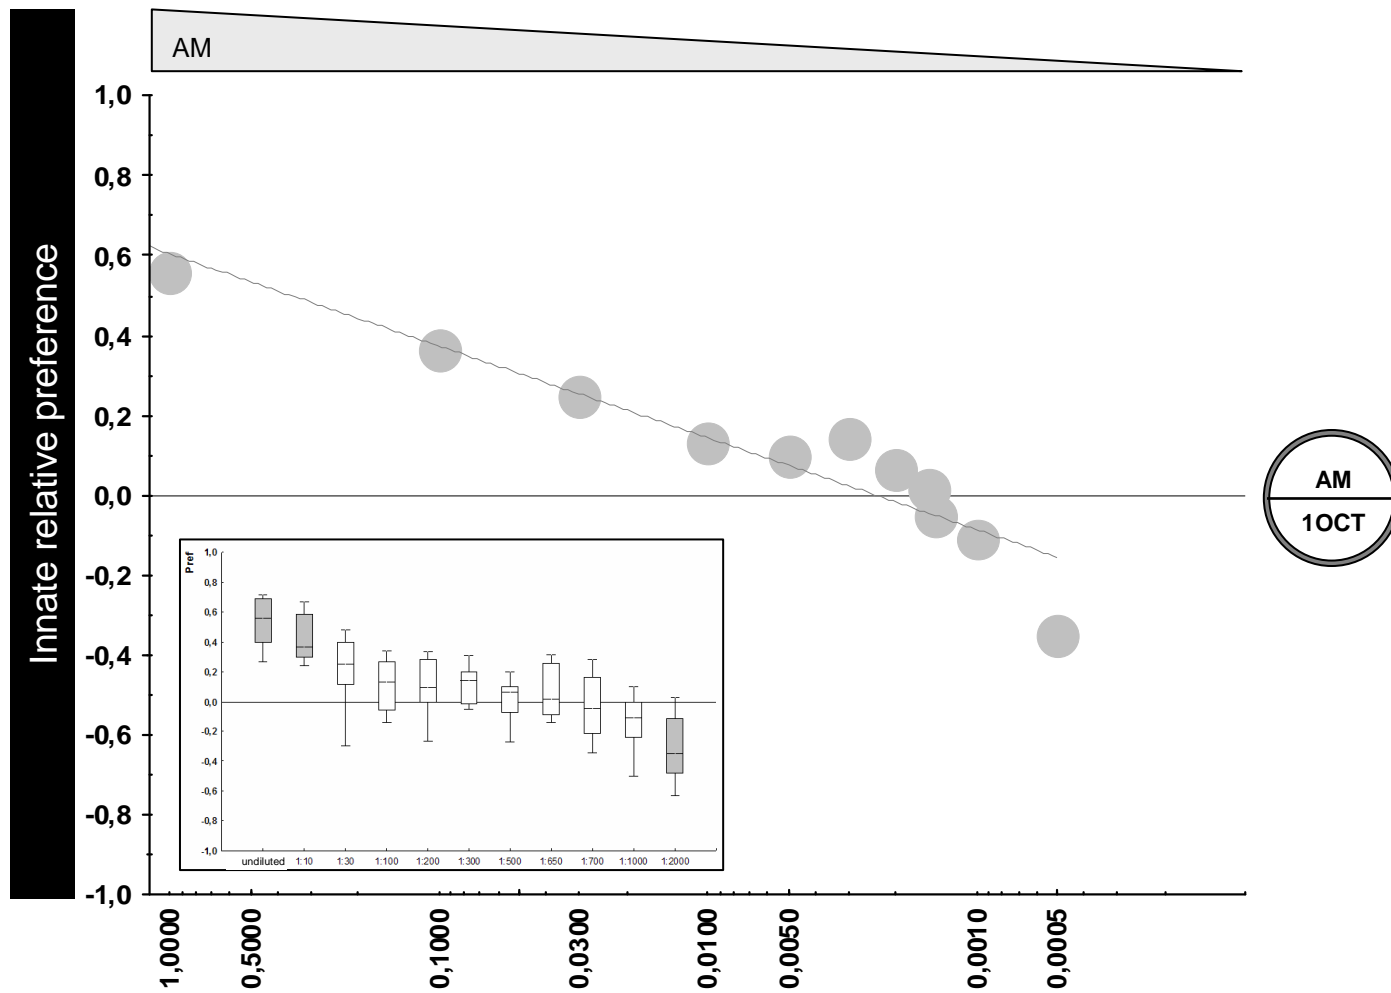

Figure 5B

Learning AM & 1OCT

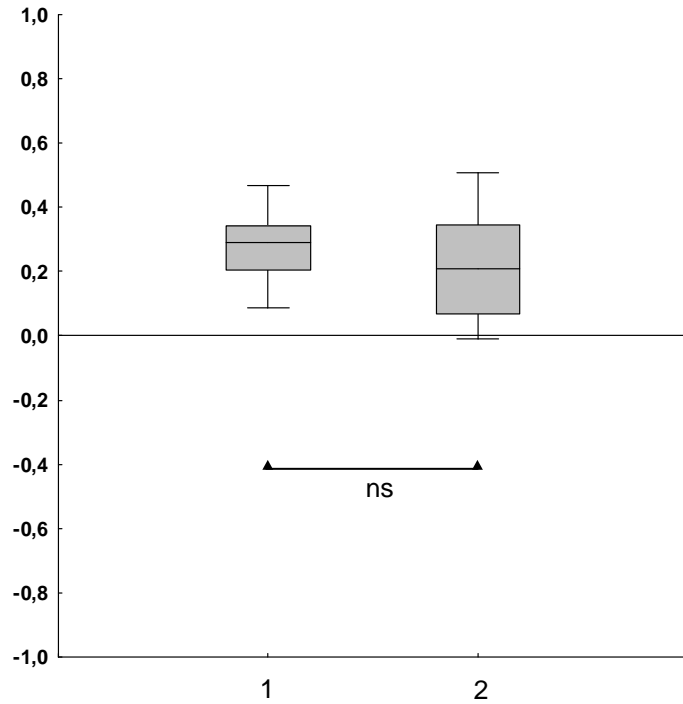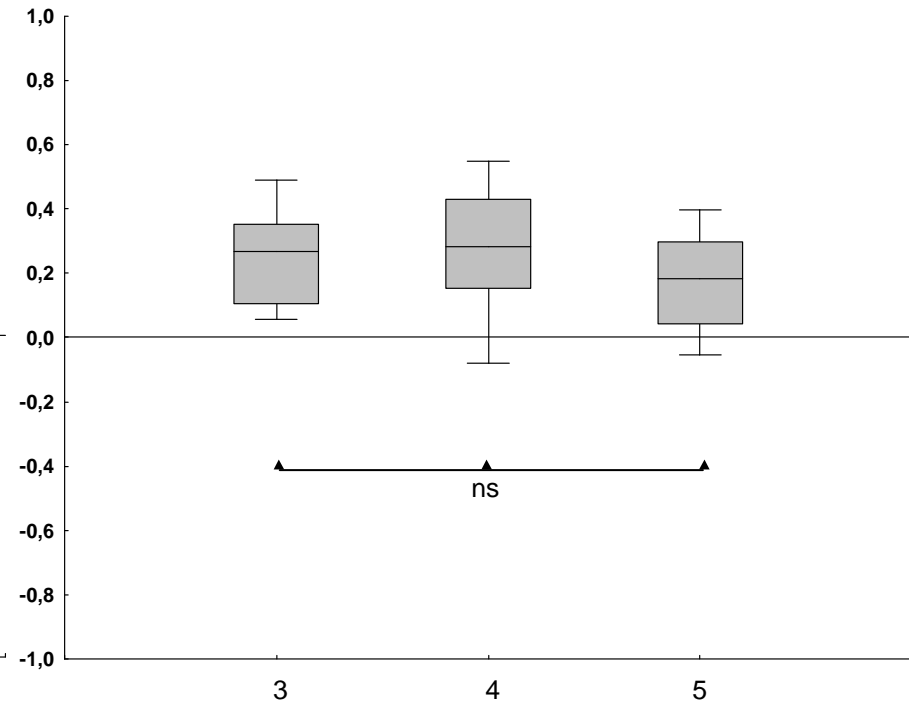

TRAIN

AM // EM

1OCT // EM

AM // 1OCT

AM // 1OCT

AM // 1OCT

TEST

AM -- EM

1OCT -- EM

AM -- 1OCT

AM -- EM

EM -- 1OCT

Figure 5C

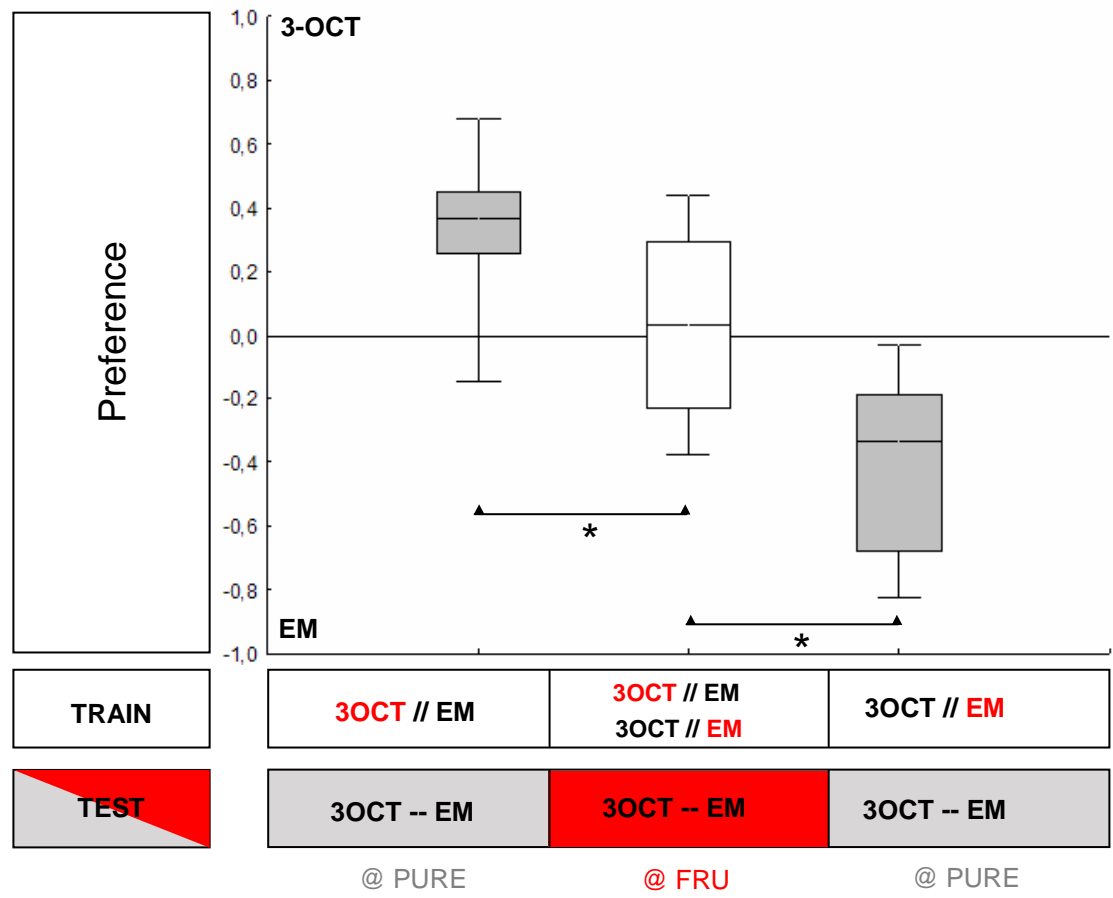

Figure 6A

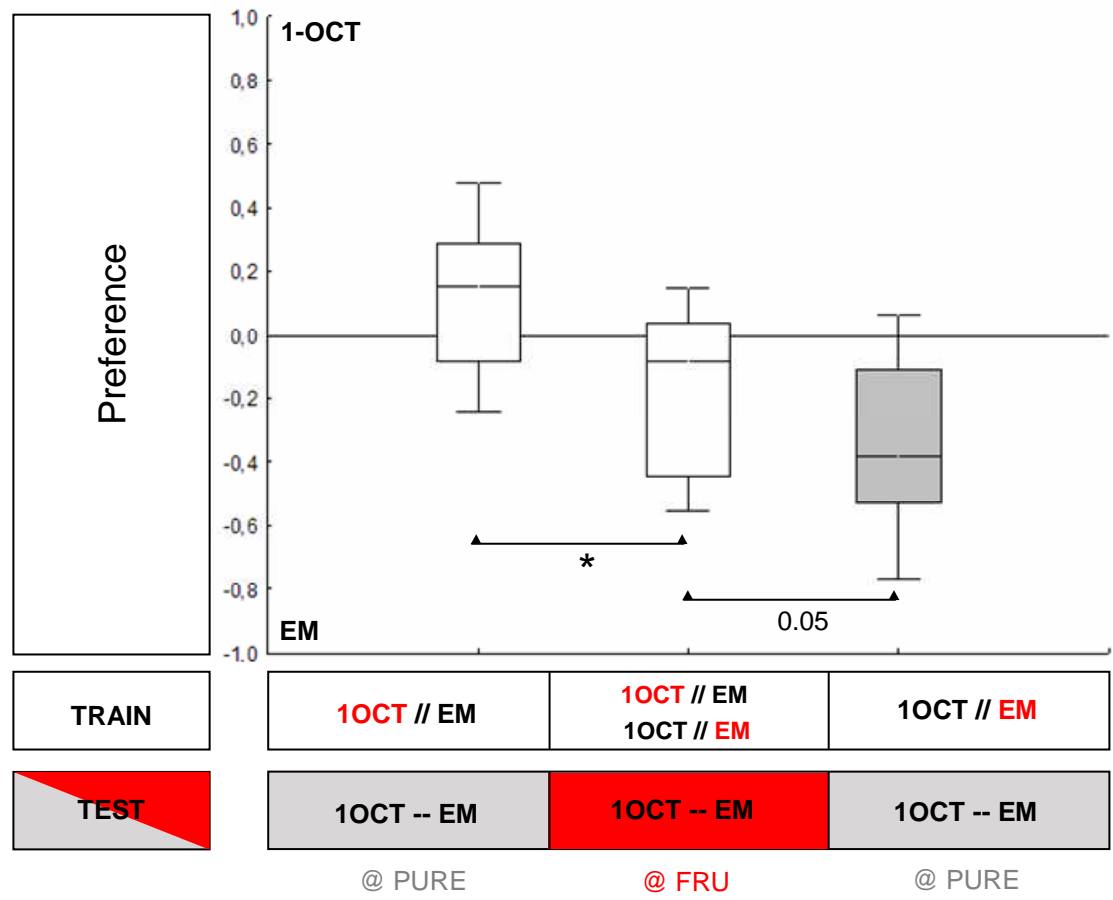

Figure 6B



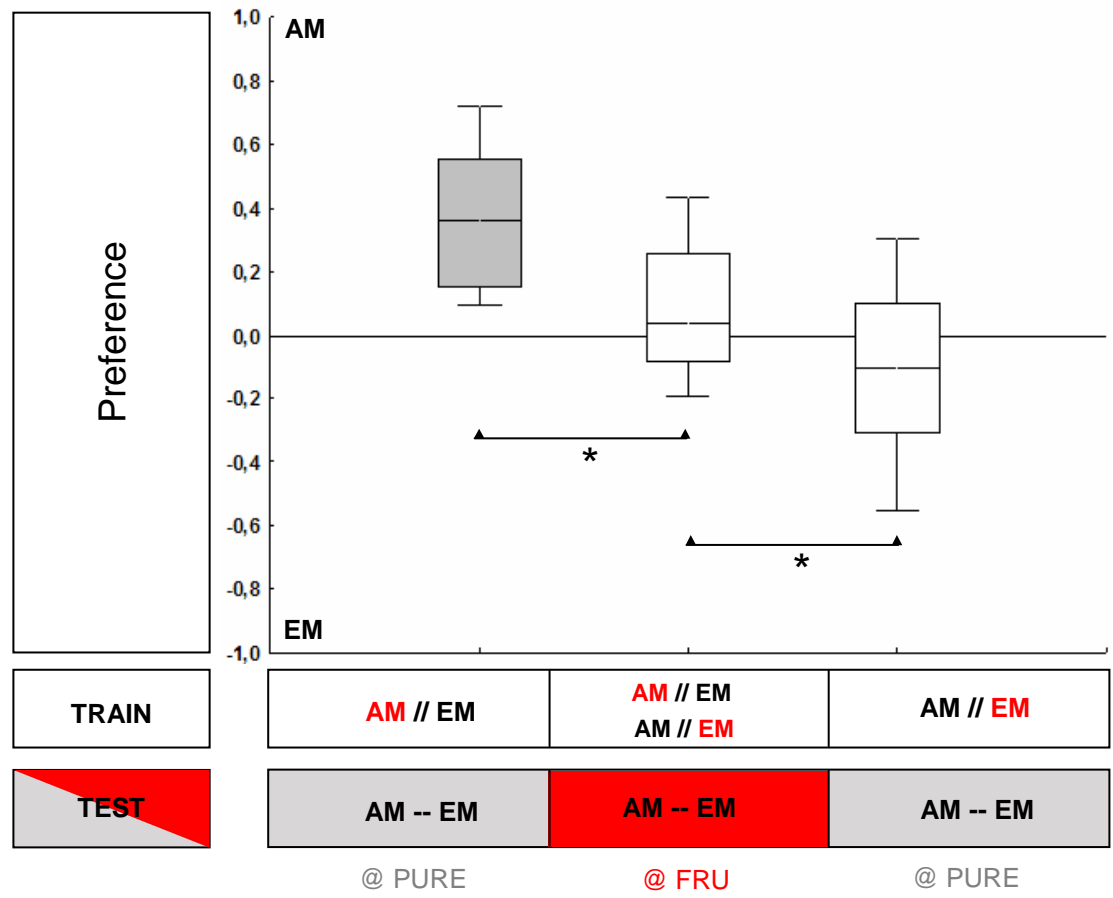

Figure 6C

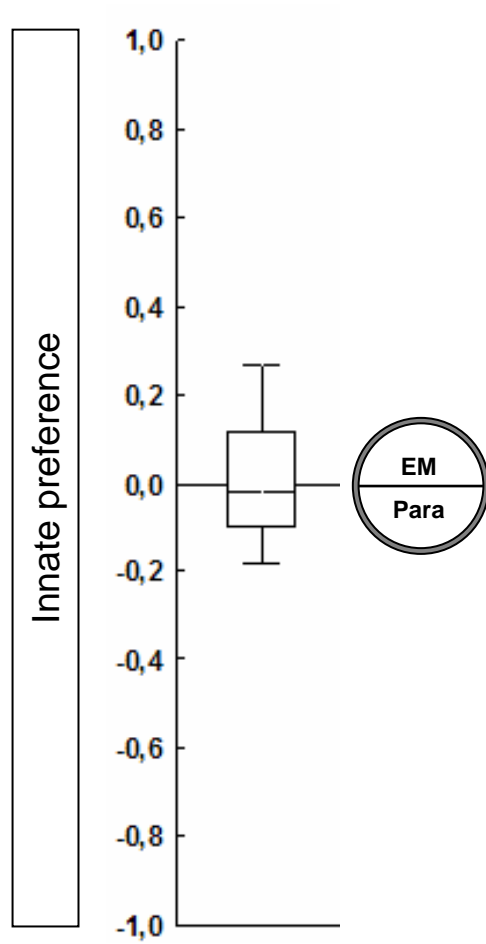

Suppl Figure 1A

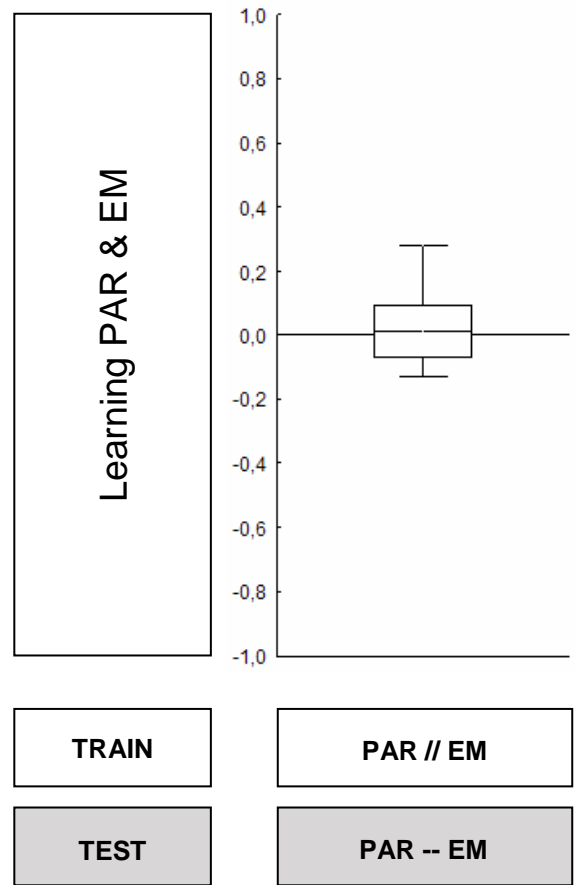

Suppl Figure 1B

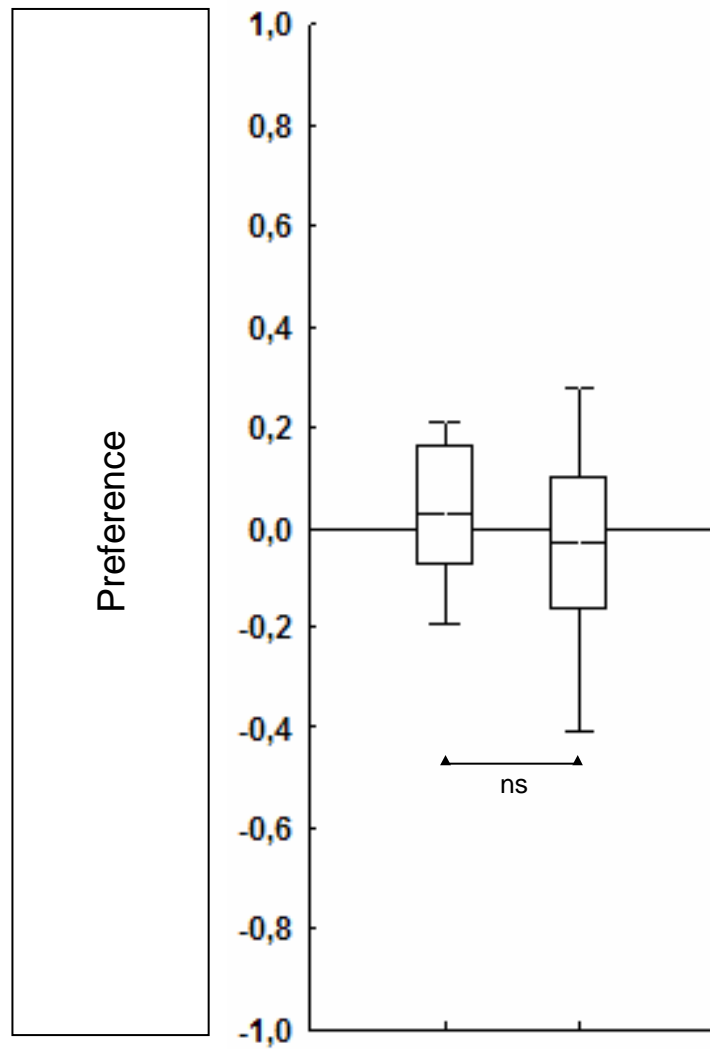

TRAIN

PAR // EM  
PAR // EM

TEST

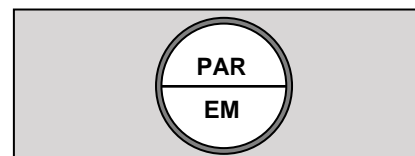

Suppl Figure 1C

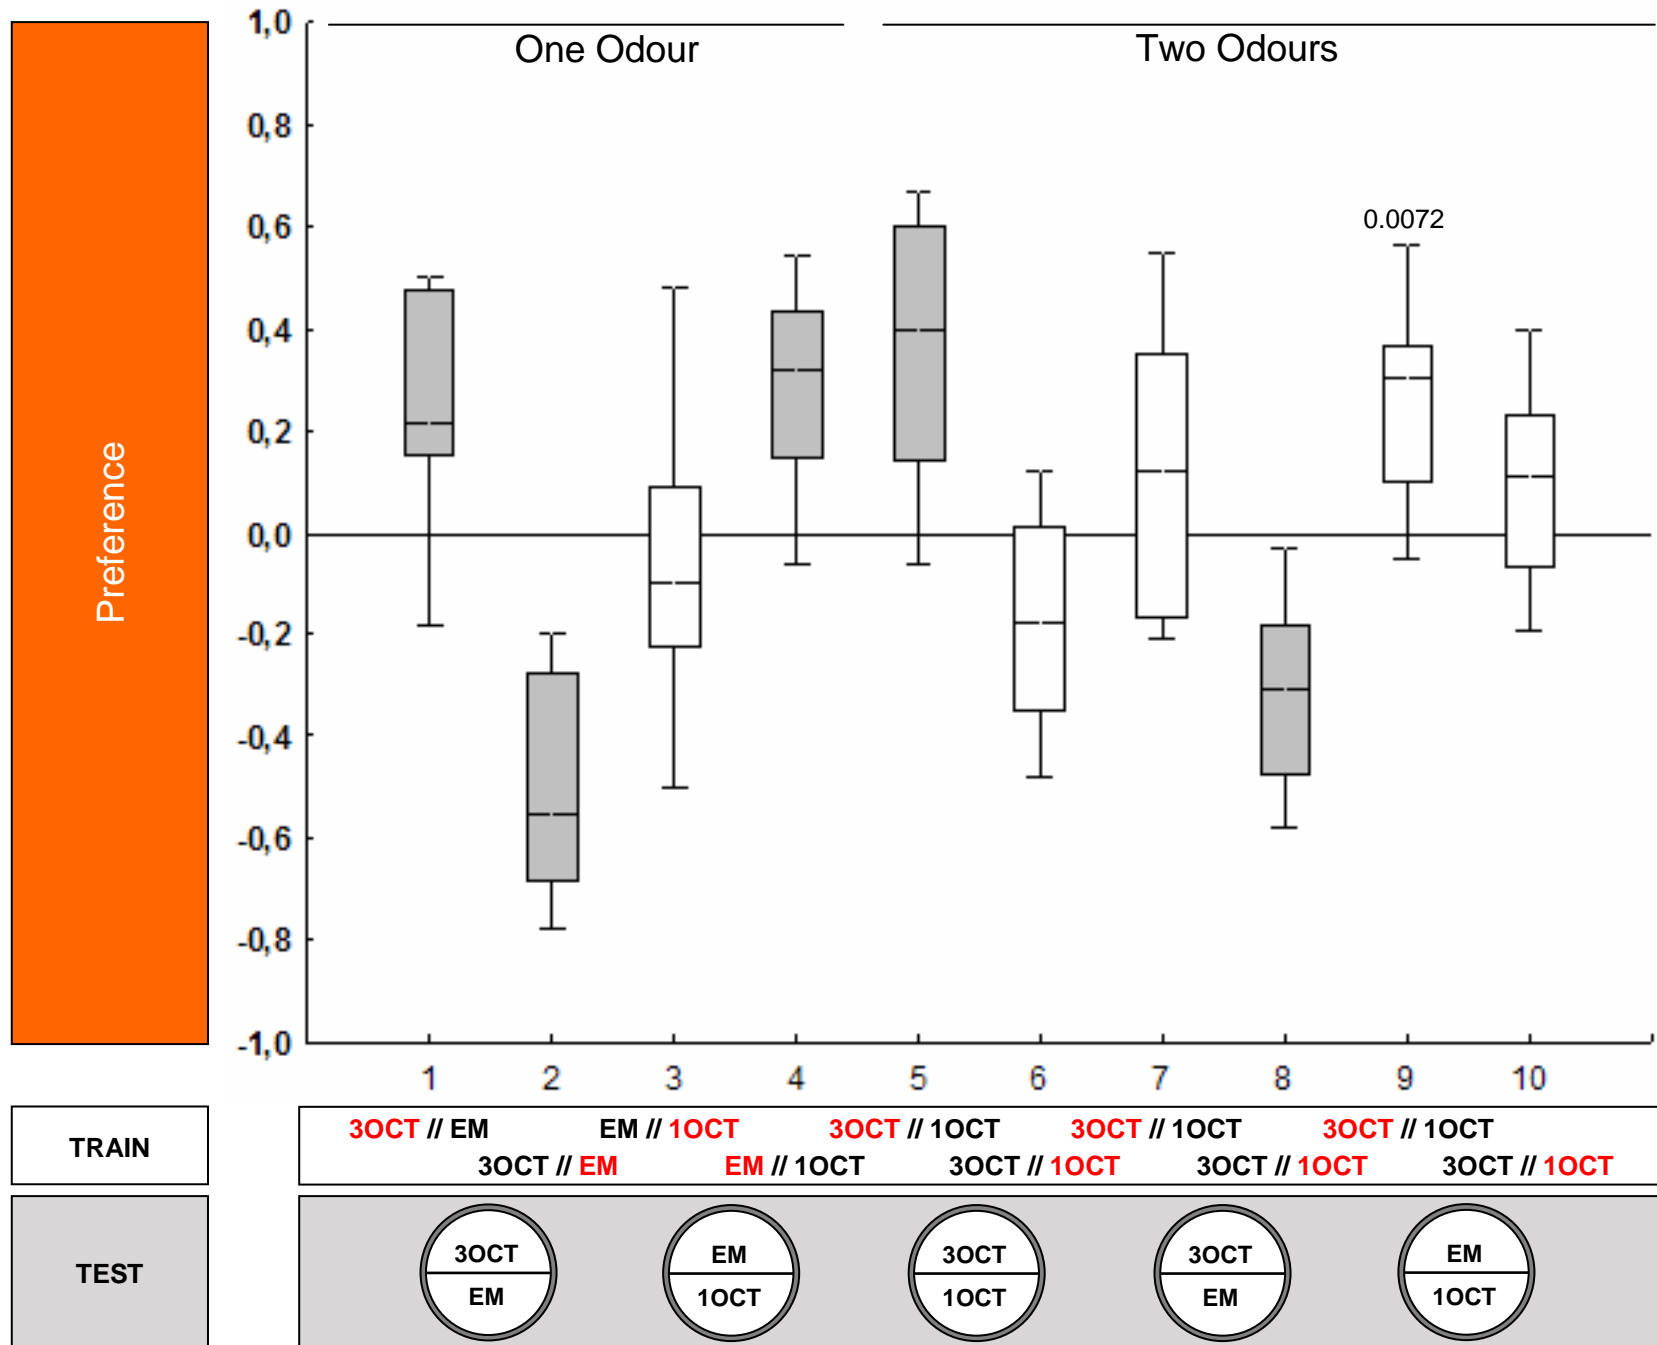

Suppl Figure 2

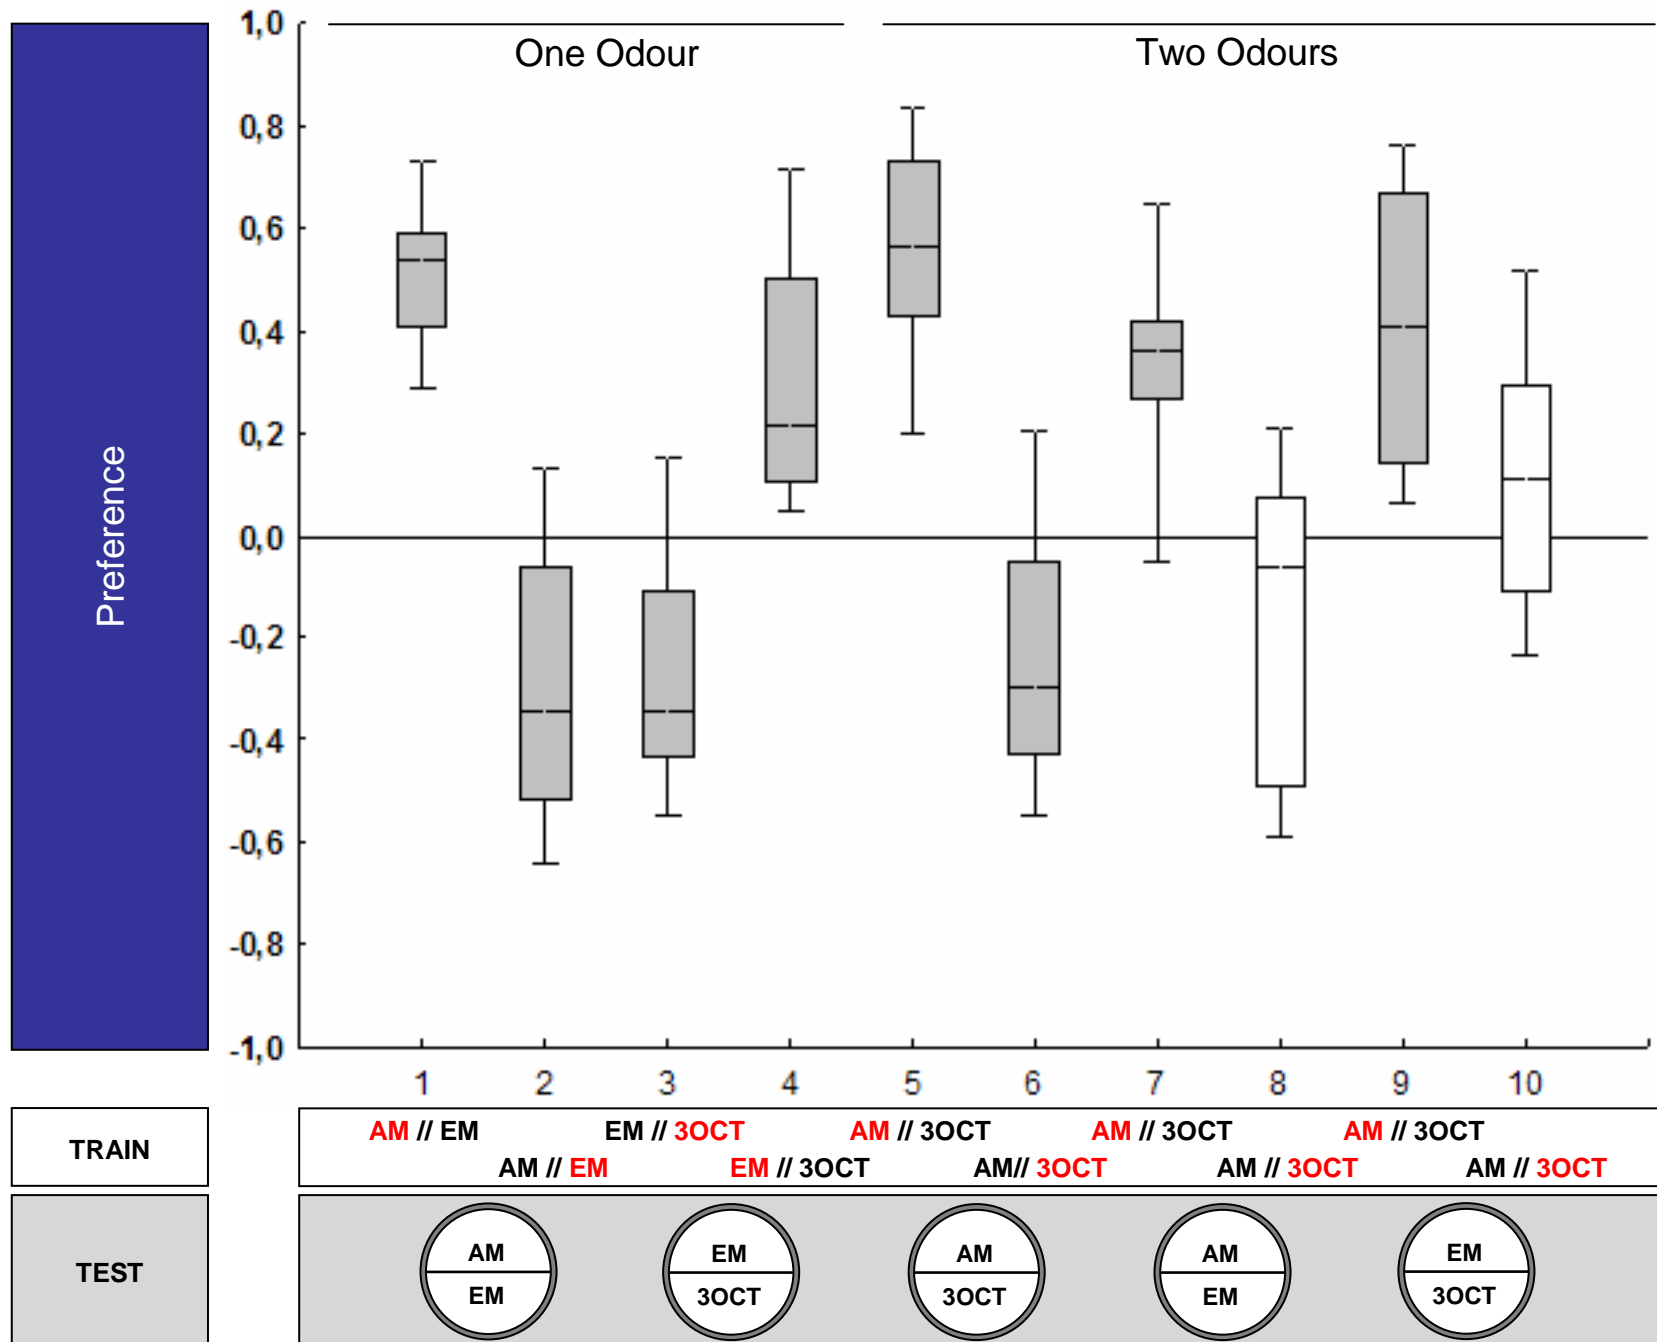

Suppl Figure 3

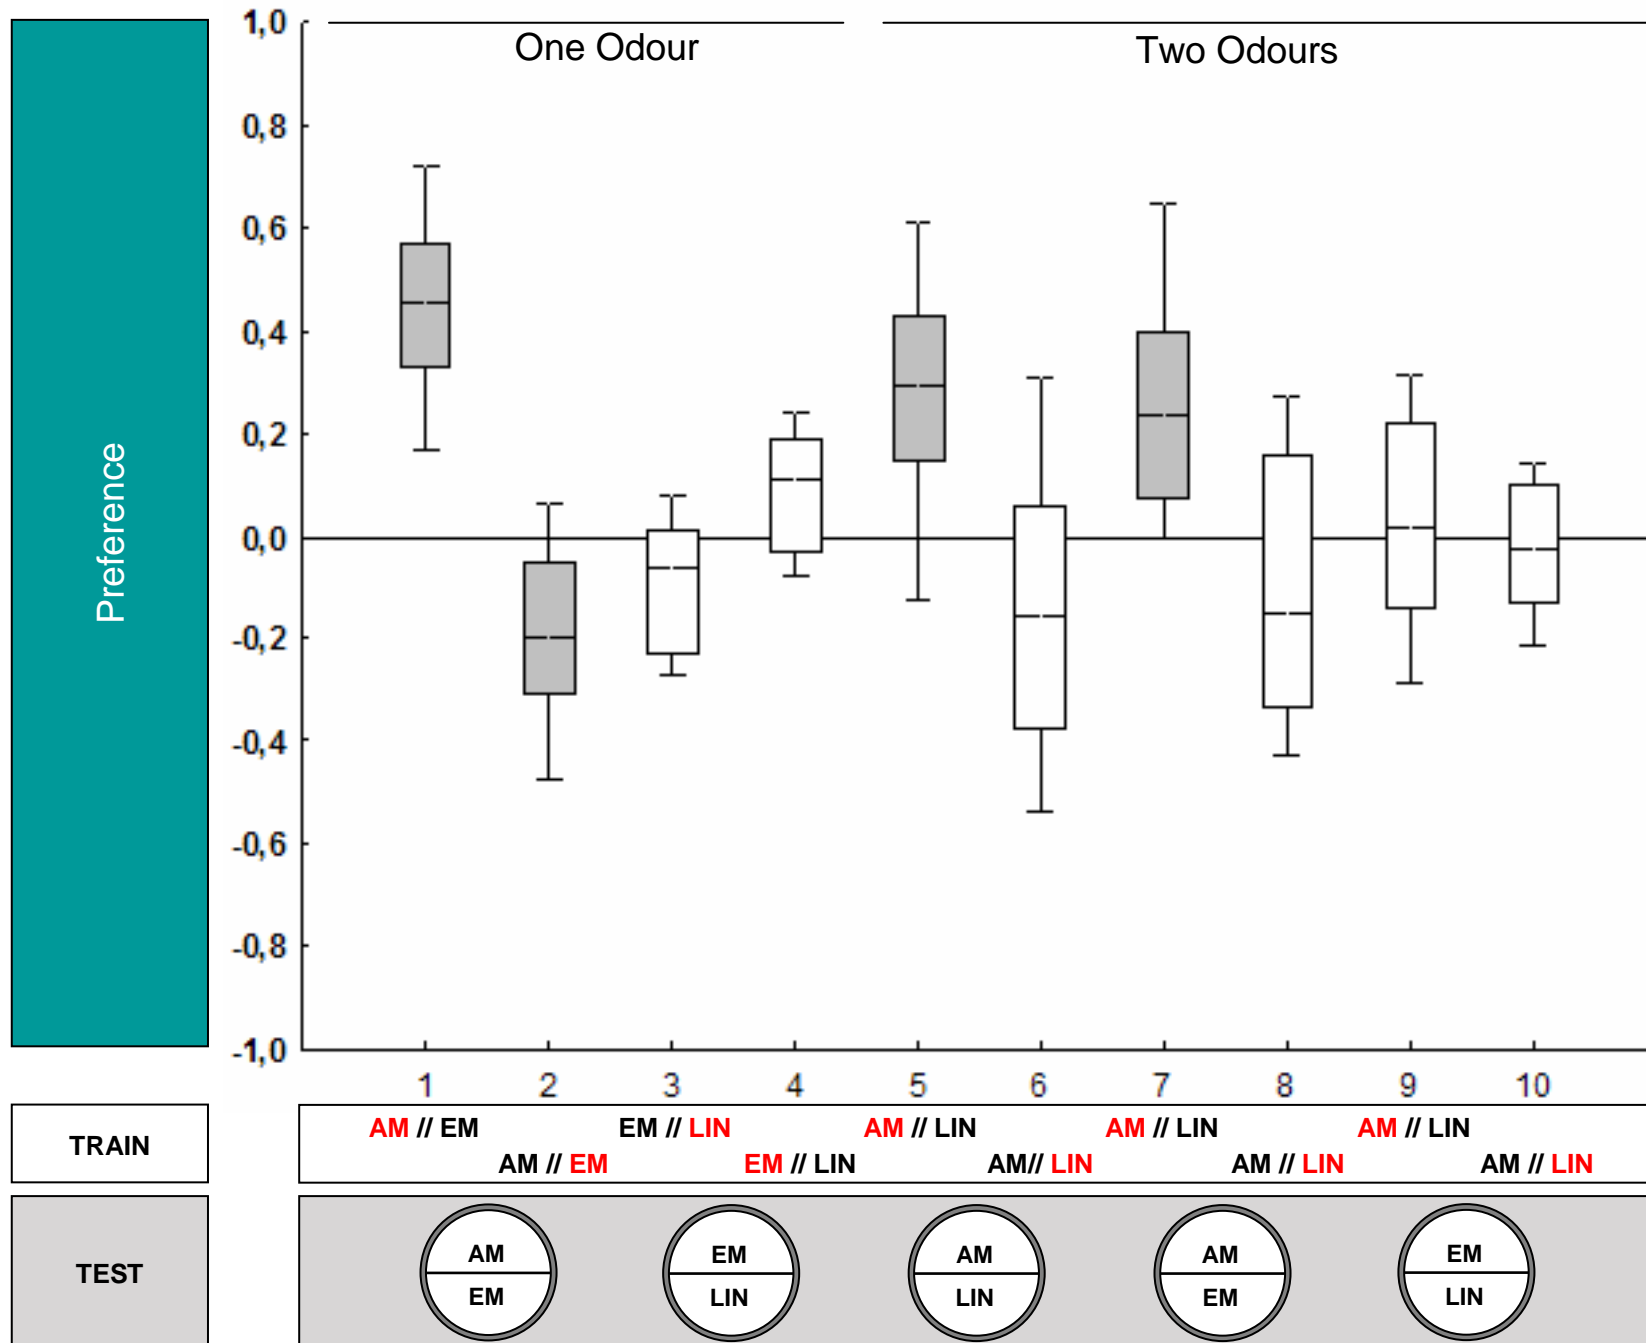

Suppl Figure 4

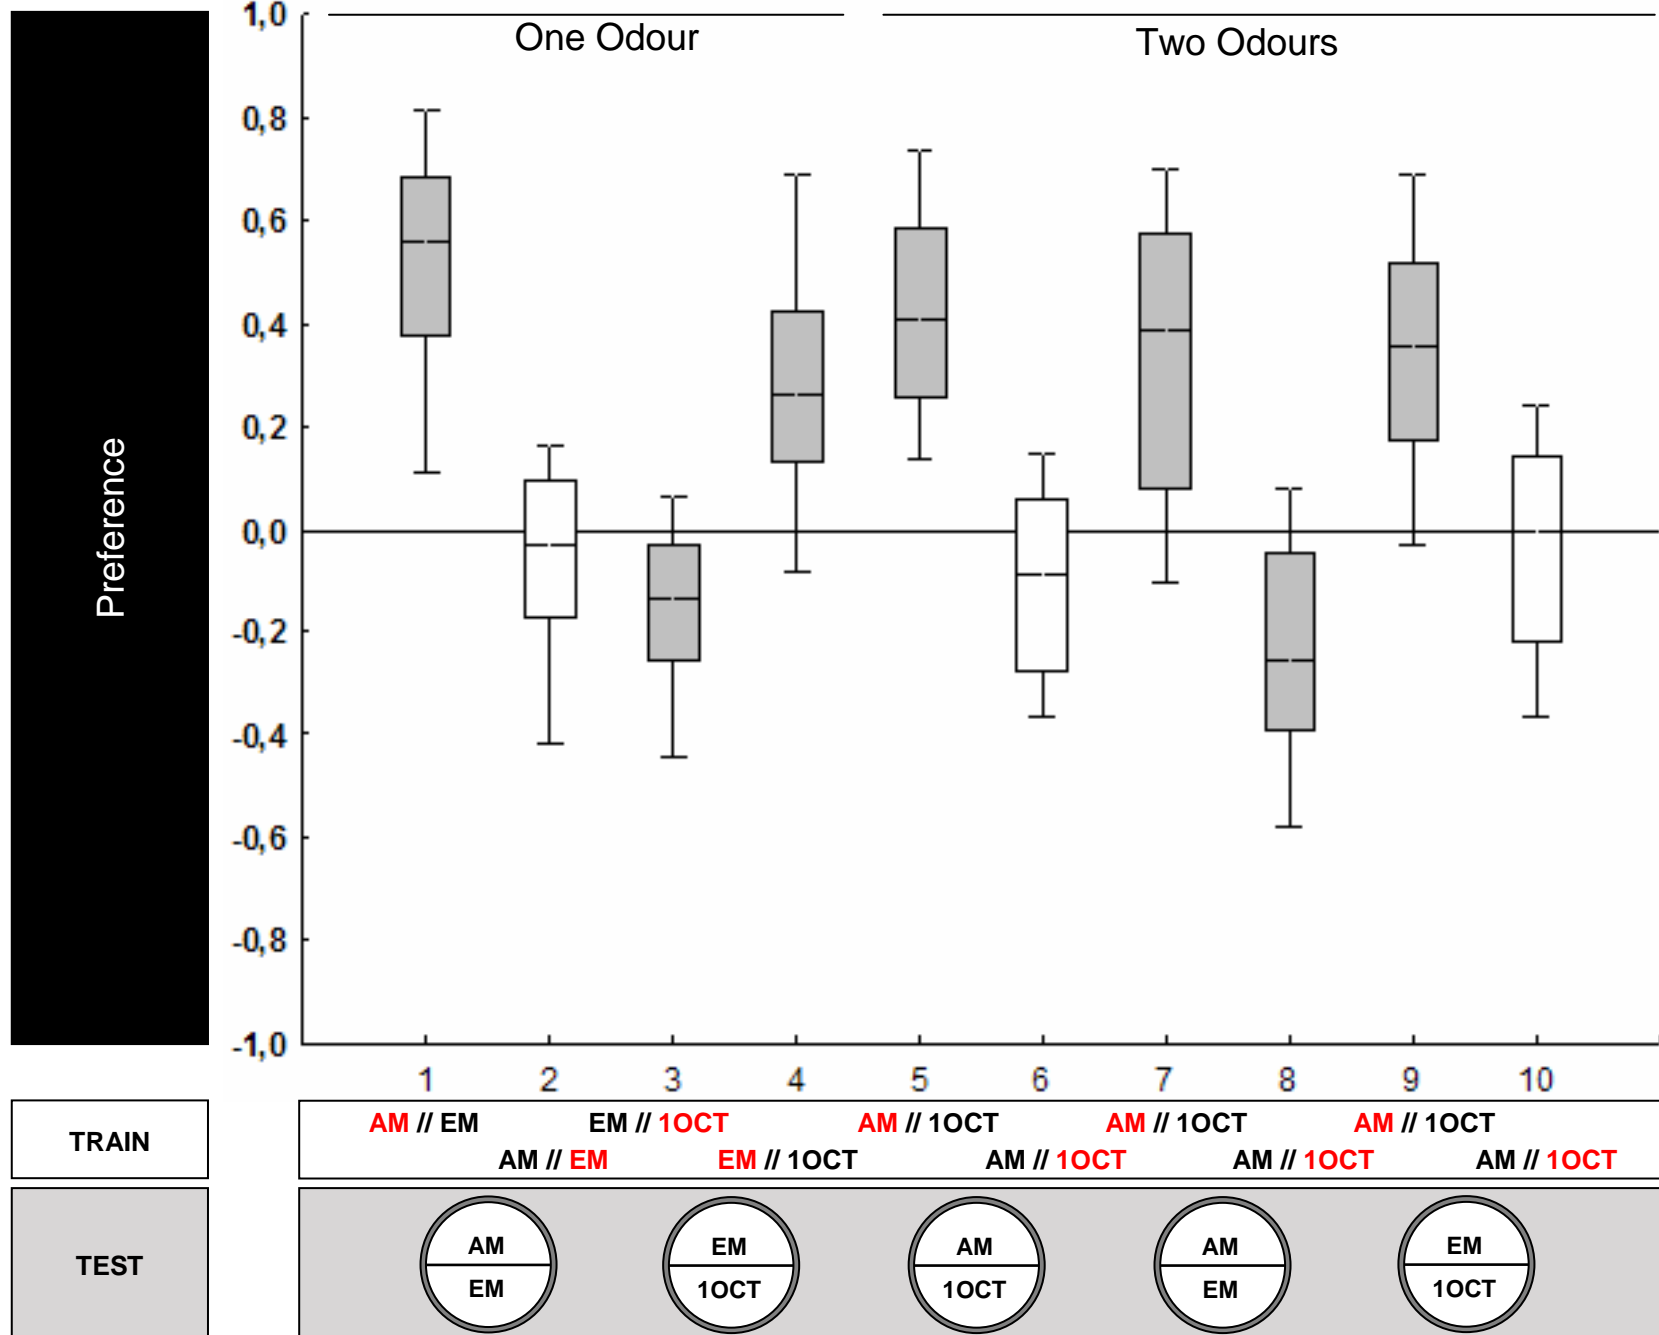

Suppl Figure 5



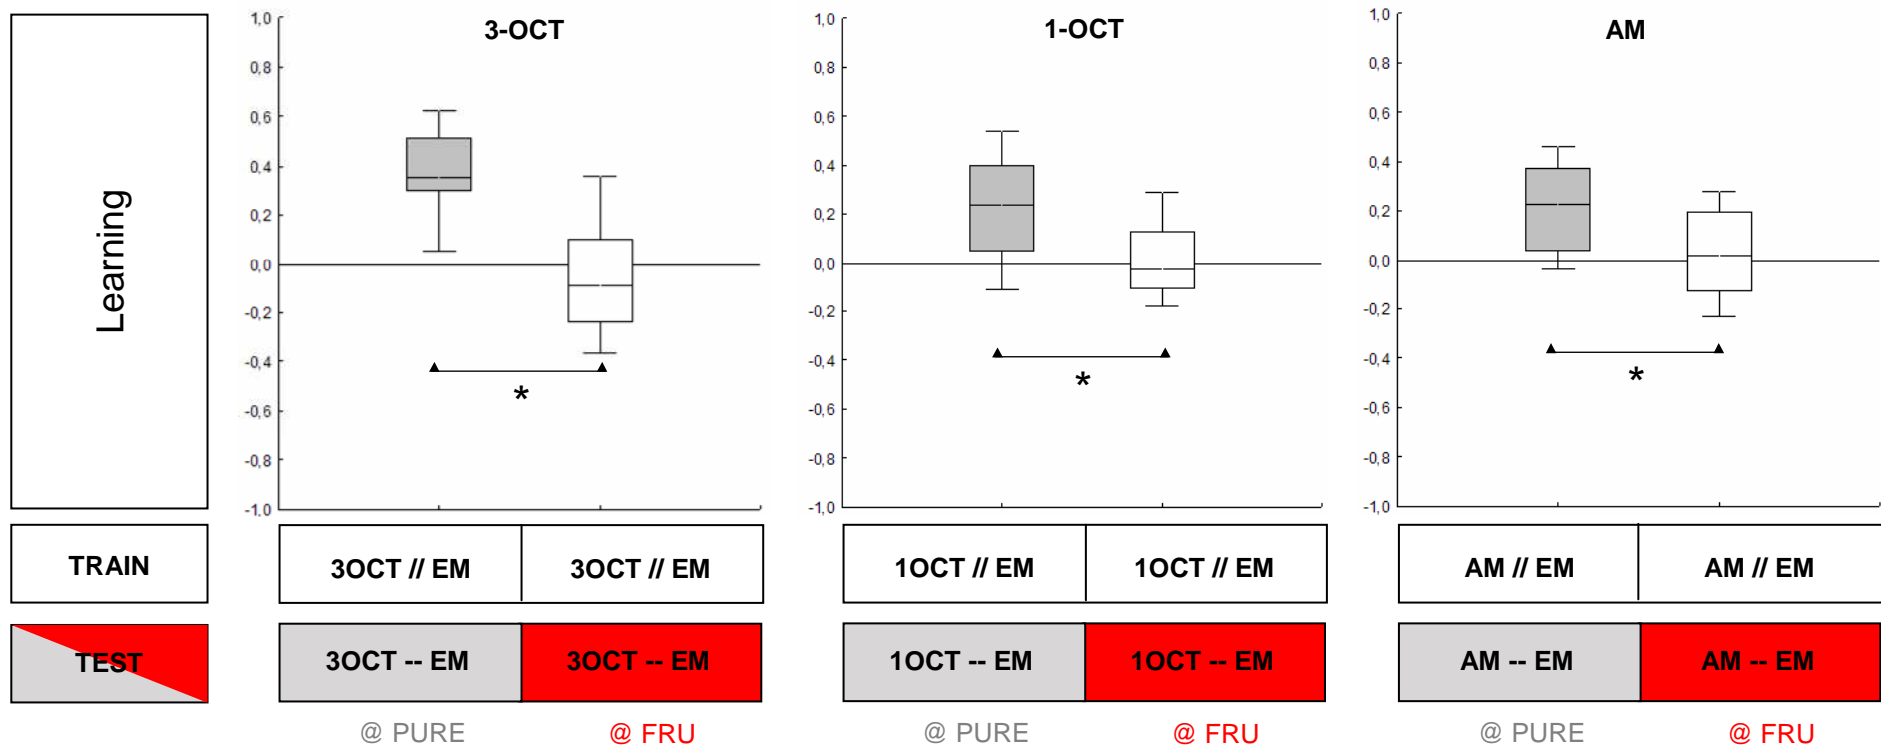

Suppl Figure 6A

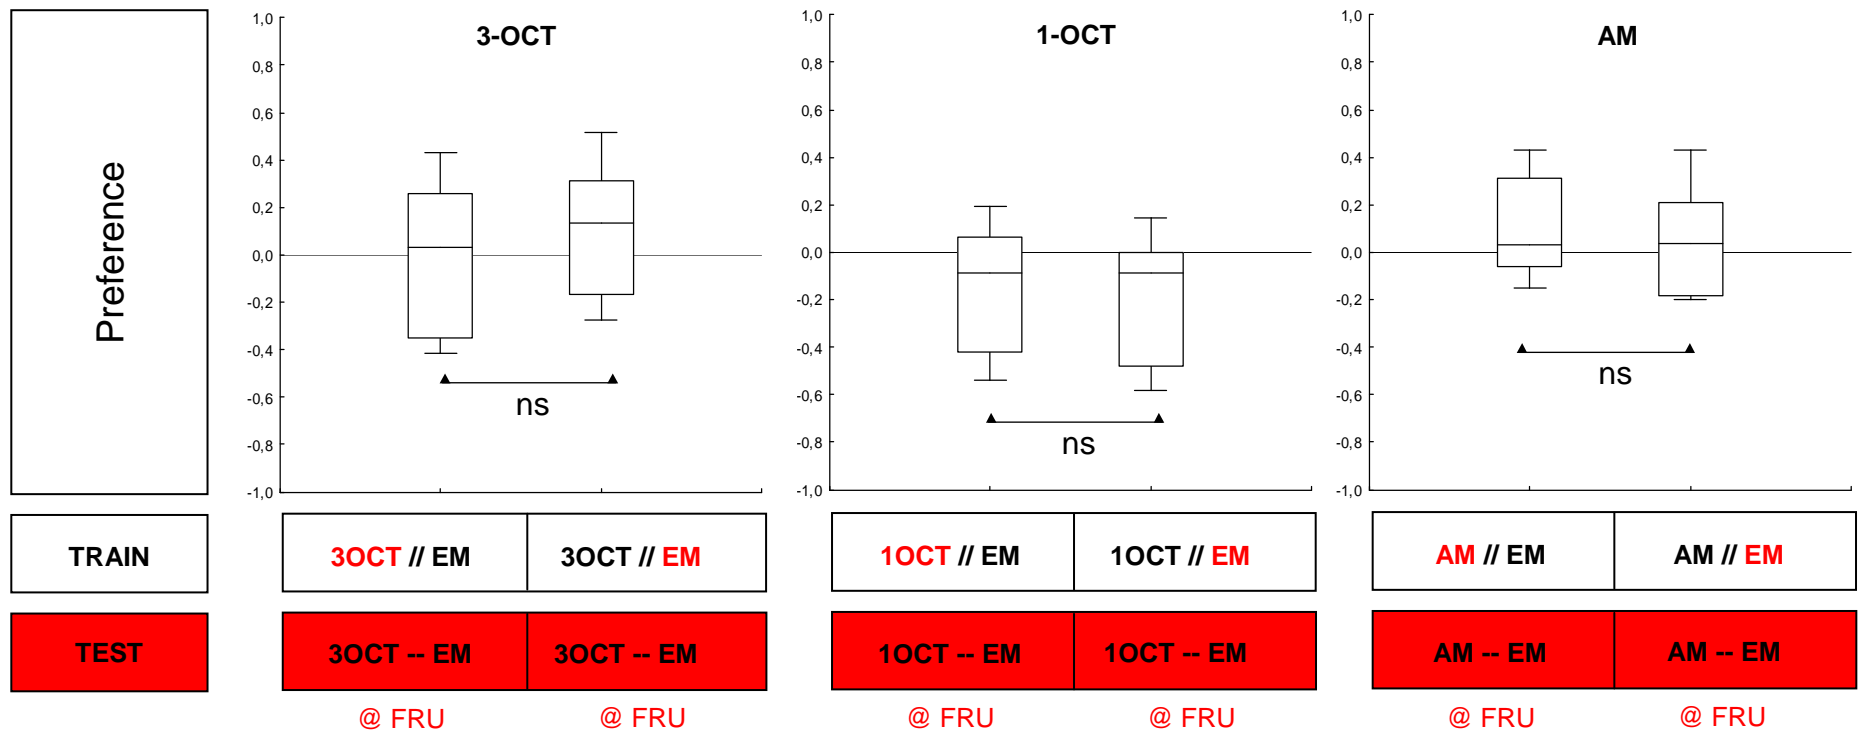

Suppl Figure 6B

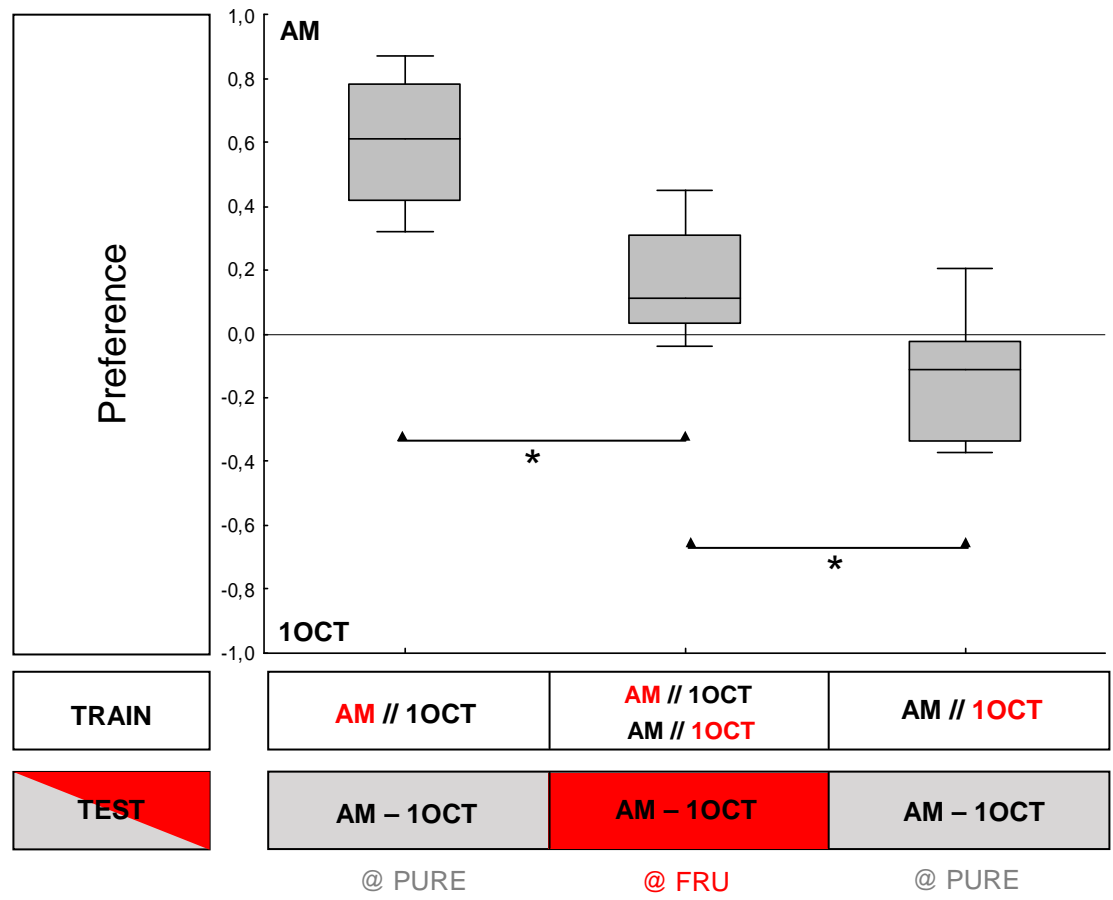

Suppl Figure 6C

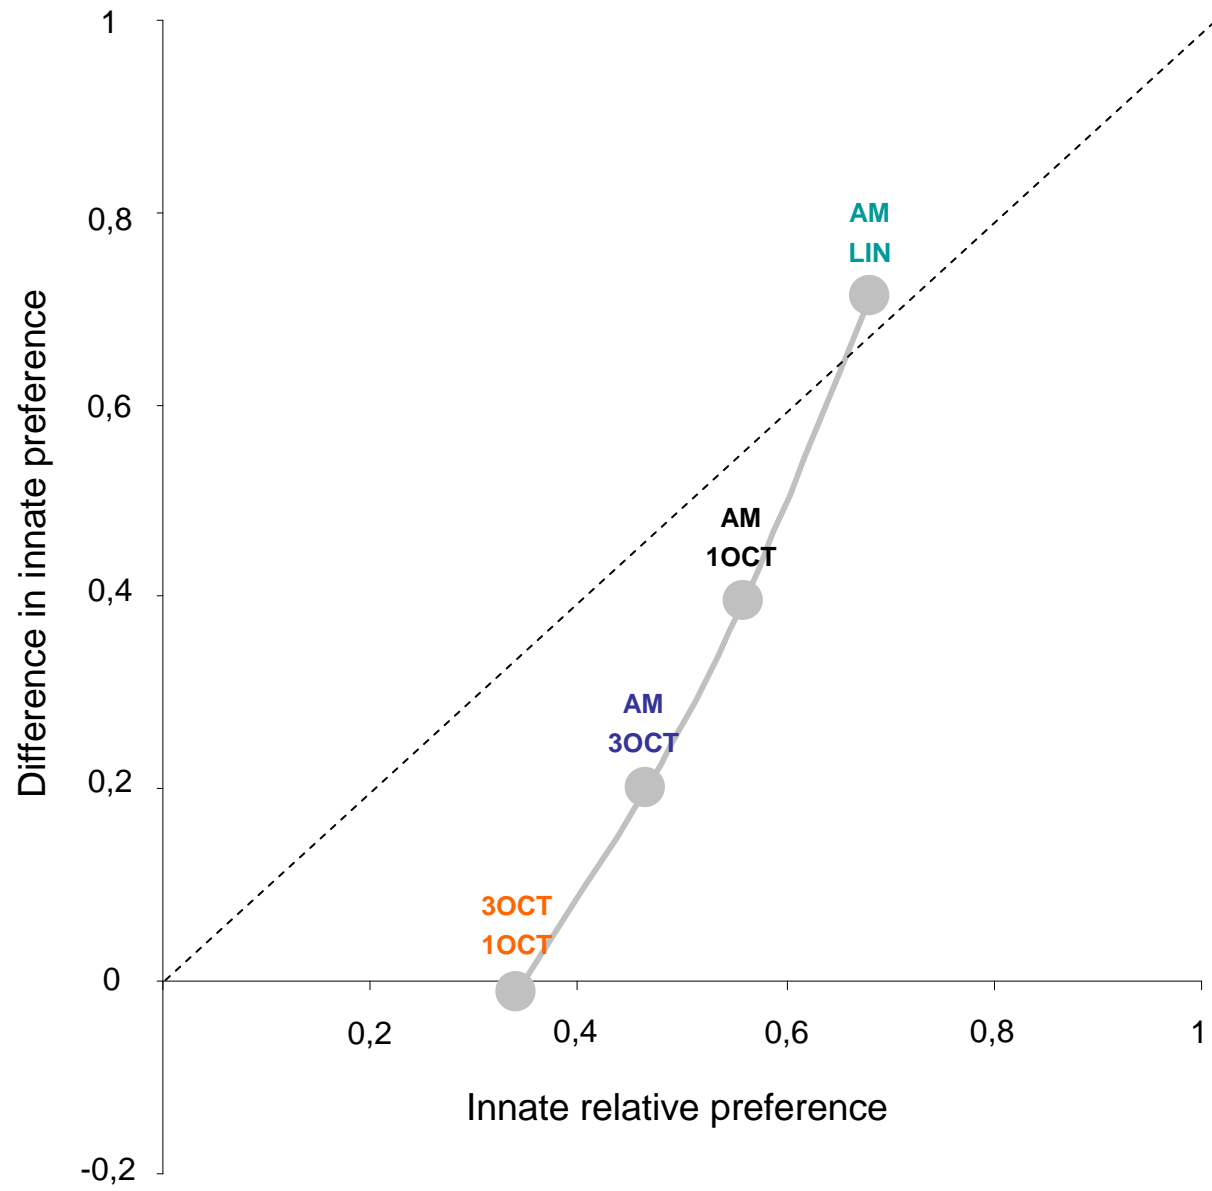

Suppl Figure 7
